# Supplementary material
Source: publisher site journal article supplement (https://www.dovepress.com/article/353435)
Supplement: Supplementary file 1 [file get_supplementary_file.php]

**Supplementary Table 1. Definitions of stroke types and risk factors**

| Condition                 | Definition                                                                                                                                                                                                                                                                                                                   |
|---------------------------|------------------------------------------------------------------------------------------------------------------------------------------------------------------------------------------------------------------------------------------------------------------------------------------------------------------------------|
| Acute ischemic stroke     | Acute onset of neurological deficit with signs or symptoms persisting longer than 24 hours with or without acute ischemic lesion(s) on brain computed tomography or with acute ischemic diffusion-weighted imaging lesion(s) on magnetic resonance imaging that corresponded to the clinical presentations.                  |
| Transient ischemic attack | Transient focal neurologic deficit of ischemic causes that resolved within 24 hours                                                                                                                                                                                                                                          |
| Intracerebral hemorrhage  | Non-traumatic abrupt onset of symptoms with relevant focal neurological deficit with or without headache or altered level of consciousness with a focal collection of blood within the brain parenchyma on computed tomography or magnetic resonance imaging that was not a hemorrhagic conversion of a cerebral infarction. |
| Hypertension              | On antihypertensive agents, or documented to have hypertension in prior clinic visits or hospital admissions                                                                                                                                                                                                                 |
| Diabetes                  | On oral hypoglycemic agents or insulin, or documented to have diabetes in prior clinic visits or hospital admissions                                                                                                                                                                                                         |
| Hyperlipidemia            | On lipid-lowering agents or with one of the following: fasting serum cholesterol $\geq$ 200 mg/dl; fasting serum low-density lipoprotein $\geq$ 130 mg/dl; fasting serum high density lipoprotein $<$ 40 mg/dl; fasting serum triglyceride $\geq$ 150 mg/dl                                                                  |
| Atrial fibrillation       | Atrial fibrillation documented on $\geq$ 1 electrocardiogram tracing during the admission, or in prior clinic visits or hospital admissions                                                                                                                                                                                  |
| Ischemic heart disease    | Documented to have coronary artery disease, including angina pectoris, unstable angina, myocardial infarction, in prior clinic visits or hospital admissions                                                                                                                                                                 |

**Supplementary Table 2. Performance of various algorithms to identify hypertension**

| Dx                                | Rx  | Y  | Alg | Sen, % (95%CI)   | Spe, % (95%CI)   | PPV, % (95% CI)  | NPV, % (95% CI)  | Kappa (95% CI)      | Estimated Prevalence, % (95% CI) |
|-----------------------------------|-----|----|-----|------------------|------------------|------------------|------------------|---------------------|----------------------------------|
| IH<br>20<br>ICDs                  | -   | NA | 1   | 93.2 (92.3–94.0) | 73.3 (70.5–76.0) | 92.3 (91.4–93.2) | 75.7 (72.9–78.4) | 0.672 (0.646–0.699) | 78.2 (77.0–79.4)                 |
|                                   | AND | NA | 2   | 73.6 (72.1–75.1) | 80.2 (77.7–82.6) | 92.8 (91.7–93.7) | 46.9 (44.5–49.3) | 0.430 (0.404–0.456) | 61.5 (60.0–62.9)                 |
|                                   | OR  | NA | 3   | 97.2 (96.6–97.7) | 53.6 (50.5–56.7) | 87.8 (86.7–88.8) | 84.6 (81.6–87.3) | 0.583 (0.554–0.613) | 85.7 (84.7–86.7)                 |
| IH<br>5<br>ICDs                   | -   | NA | 4   | 74.9 (73.4–76.3) | 80.0 (77.5–82.4) | 92.8 (91.8–93.7) | 48.1 (45.7–50.5) | 0.444 (0.418–0.471) | 62.5 (61.1–63.9)                 |
|                                   | AND | NA | 5   | 58.8 (57.1–60.4) | 85.1 (82.8–87.3) | 93.1 (92.0–94.2) | 37.5 (35.5–39.5) | 0.303 (0.280–0.325) | 48.9 (47.4–50.3)                 |
|                                   | OR  | NA | 6   | 93.7 (92.8–94.5) | 55.5 (52.4–58.6) | 87.9 (86.8–88.9) | 71.9 (68.6–75.0) | 0.535 (0.504–0.565) | 82.6 (81.5–83.7)                 |
| 1 IC<br>or<br>2<br>OC             | -   | 1  | 7   | 35.6 (34.0–37.2) | 91.3 (89.4–92.9) | 93.4 (91.9–94.6) | 29.2 (27.6–30.8) | 0.153 (0.137–0.169) | 29.5 (28.2–30.9)                 |
|                                   | AND | 1  | 8   | 31.3 (29.8–32.8) | 93.6 (92.0–95.1) | 94.4 (92.9–95.7) | 28.4 (26.9–29.9) | 0.137 (0.123–0.151) | 25.7 (24.4–27.0)                 |
|                                   | OR  | 1  | 9   | 54.1 (52.5–55.8) | 74.4 (71.6–77.0) | 87.9 (86.4–89.2) | 32.0 (30.2–33.9) | 0.194 (0.171–0.217) | 47.7 (46.3–49.2)                 |
|                                   | -   | 2  | 10  | 41.2 (39.6–42.9) | 89.2 (87.2–91.1) | 92.9 (91.6–94.2) | 30.6 (29.0–32.3) | 0.182 (0.164–0.199) | 34.4 (33.0–35.8)                 |
|                                   | AND | 2  | 11  | 36.5 (34.9–38.1) | 91.7 (89.8–93.3) | 93.8 (92.4–95.0) | 29.5 (28.0–31.2) | 0.161 (0.145–0.177) | 30.1 (28.8–31.5)                 |
|                                   | OR  | 2  | 12  | 58.5 (56.8–60.1) | 71.0 (68.1–73.8) | 87.4 (86.0–88.7) | 33.2 (31.2–35.2) | 0.210 (0.186–0.235) | 51.8 (50.4–52.9)                 |
| IH<br>or<br>1 IC<br>or<br>2<br>OC | -   | 1  | 13  | 84.2 (83.0–85.4) | 75.5 (72.8–78.1) | 92.2 (91.2–93.1) | 58.2 (55.5–60.8) | 0.540 (0.513–0.568) | 70.8 (69.4–72.1)                 |
|                                   | AND | 1  | 14  | 72.9 (71.4–74.4) | 80.4 (77.9–82.8) | 92.8 (91.7–93.7) | 46.3 (44.0–48.7) | 0.423 (0.397–0.449) | 60.9 (59.5–62.3)                 |
|                                   | OR  | 1  | 15  | 96.8 (96.1–97.3) | 48.3 (45.2–51.5) | 86.6 (85.5–87.6) | 81.4 (78.1–84.4) | 0.527 (0.496–0.558) | 86.6 (85.6–87.6)                 |
|                                   | -   | 2  | 16  | 85.7 (84.5–86.8) | 74.1 (71.3–76.7) | 91.9 (90.9–92.8) | 60.1 (57.3–62.8) | 0.552 (0.524–0.580) | 72.2 (70.9–73.5)                 |
|                                   | AND | 2  | 17  | 75.2 (73.7–76.6) | 78.8 (76.1–81.2) | 92.4 (91.4–93.4) | 48.0 (45.6–50.4) | 0.439 (0.413–0.466) | 63.0 (61.6–64.4)                 |
|                                   | OR  | 2  | 18  | 97.0 (96.4–97.6) | 47.0 (43.9–50.1) | 86.3 (85.2–87.3) | 82.2 (78.8–85.2) | 0.519 (0.488–0.550) | 87.1 (86.1–88.1)                 |

**Abbreviations:** Alg, algorithm; CI, confidence interval; Dx, diagnosis; IC, inpatient claim; ICD, International Classification of Diseases; IH, index hospitalization; NA, not applicable; NPV, negative prediction value; OC, outpatient claim; PPV, positive predictive value; Rx, prescription; Sen, sensitivity; Spe, specificity; Y, years of lookback period.

**Supplementary Table 3. Performance of various algorithms to identify diabetes**

| Dx                                | Rx  | Y  | Alg | Sen, % (95%CI)   | Spe, % (95%CI)   | PPV, % (95% CI)  | NPV, % (95% CI)  | Kappa (95% CI)      | Estimated Prevalence, % (95% CI) |
|-----------------------------------|-----|----|-----|------------------|------------------|------------------|------------------|---------------------|----------------------------------|
| IH<br>20<br>ICDs                  | -   | NA | 1   | 88.6 (87.1–90.0) | 95.9 (95.0–96.6) | 93.8 (92.6–94.9) | 92.2 (91.2–93.2) | 0.852 (0.836–0.867) | 39.2 (37.8–40.7)                 |
|                                   | AND | NA | 2   | 75.1 (73.0–77.0) | 97.5 (96.8–98.0) | 95.5 (94.3–96.5) | 84.6 (83.3–85.9) | 0.749 (0.729–0.768) | 32.6 (31.3–34.0)                 |
|                                   | OR  | NA | 3   | 90.9 (89.5–92.1) | 91.5 (90.4–92.6) | 88.4 (86.9–89.8) | 93.4 (92.4–94.3) | 0.821 (0.804–0.837) | 42.7 (41.2–44.1)                 |
| IH<br>5<br>ICDs                   | -   | NA | 4   | 69.7 (67.6–71.8) | 97.2 (96.6–97.8) | 94.7 (93.4–95.8) | 81.9 (80.5–83.2) | 0.696 (0.675–0.717) | 30.5 (29.2–31.9)                 |
|                                   | AND | NA | 5   | 58.8 (56.5–61.0) | 98.2 (97.6–98.6) | 95.8 (94.4–96.9) | 77.0 (75.6–78.5) | 0.603 (0.581–0.626) | 25.5 (24.2–26.8)                 |
|                                   | OR  | NA | 6   | 88.2 (86.6–89.6) | 92.2 (91.2–93.2) | 89.0 (87.5–90.4) | 91.7 (90.5–92.7) | 0.805 (0.788–0.823) | 41.1 (39.7–42.6)                 |
| 1 IC<br>or<br>2<br>OC             | -   | 1  | 7   | 40.2 (38.0–42.5) | 98.5 (98.0–98.9) | 95.0 (93.2–96.4) | 69.9 (68.4–71.4) | 0.423 (0.399–0.447) | 17.6 (16.5–18.7)                 |
|                                   | AND | 1  | 8   | 34.8 (32.6–37.0) | 99.1 (98.7–99.4) | 96.5 (94.8–97.7) | 68.2 (66.7–69.6) | 0.373 (0.350–0.397) | 15.0 (13.9–16.0)                 |
|                                   | OR  | 1  | 9   | 47.9 (45.7–50.2) | 97.1 (96.4–97.7) | 92.1 (90.3–93.7) | 72.4 (70.9–73.9) | 0.484 (0.460–0.508) | 21.6 (20.4–22.8)                 |
|                                   | -   | 2  | 10  | 45.0 (42.7–47.3) | 98.0 (97.4–98.5) | 94.1 (92.4–95.6) | 71.5 (70.0–73.0) | 0.465 (0.441–0.489) | 19.9 (18.7–21.1)                 |
|                                   | AND | 2  | 11  | 38.3 (36.1–40.6) | 98.8 (98.3–99.2) | 95.8 (94.1–97.1) | 69.3 (67.8–70.8) | 0.407 (0.383–0.430) | 16.6 (15.5–17.7)                 |
|                                   | OR  | 2  | 12  | 52.2 (49.9–54.5) | 96.3 (95.5–97.0) | 90.9 (89.1–92.6) | 74.0 (72.5–75.4) | 0.517 (0.493–0.542) | 23.8 (22.6–25.1)                 |
| IH<br>or<br>1 IC<br>or<br>2<br>OC | -   | 1  | 13  | 79.6 (77.7–81.4) | 96.4 (95.6–97.1) | 94.0 (92.8–95.2) | 87.0 (85.7–88.1) | 0.778 (0.759–0.796) | 35.1 (33.8–36.6)                 |
|                                   | AND | 1  | 14  | 71.7 (69.6–73.7) | 97.7 (97.1–98.2) | 95.7 (94.5–96.7) | 82.9 (81.6–84.3) | 0.720 (0.700–0.741) | 31.1 (29.8–32.5)                 |
|                                   | OR  | 1  | 15  | 89.9 (88.4–91.2) | 90.7 (89.5–91.8) | 87.3 (85.7–88.7) | 92.6 (91.6–93.6) | 0.802 (0.784–0.820) | 42.8 (41.3–44.2)                 |
|                                   | -   | 2  | 16  | 80.8 (79.0–82.6) | 96.1 (95.3–96.8) | 93.6 (92.3–94.7) | 87.6 (86.3–88.8) | 0.785 (0.766–0.803) | 35.9 (34.5–37.3)                 |
|                                   | AND | 2  | 17  | 73.5 (71.5–75.5) | 97.6 (97.0–98.2) | 95.6 (94.5–96.6) | 83.9 (82.5–85.1) | 0.736 (0.716–0.756) | 31.9 (30.6–33.3)                 |
|                                   | OR  | 2  | 18  | 90.3 (88.9–91.6) | 90.2 (89.0–91.3) | 86.8 (85.2–88.3) | 92.9 (91.9–93.9) | 0.801 (0.783–0.819) | 43.2 (41.8–44.7)                 |

**Abbreviations:** Alg, algorithm; CI, confidence interval; Dx, diagnosis; IC, inpatient claim; ICD, International Classification of Diseases; IH, index hospitalization; NA, not applicable; NPV, negative prediction value; OC, outpatient claim; PPV, positive predictive value; Rx, prescription; Sen, sensitivity; Spe, specificity; Y, years of lookback period.

**Supplementary Table 4. Performance of various algorithms to identify hyperlipidemia**

| Dx                                | Rx  | Y  | Alg | Sen, % (95%CI)   | Spe, % (95%CI)   | PPV, % (95% CI)  | NPV, % (95% CI)  | Kappa (95% CI)      | Estimated Prevalence, % (95% CI) |
|-----------------------------------|-----|----|-----|------------------|------------------|------------------|------------------|---------------------|----------------------------------|
| IH<br>20<br>ICDs                  | -   | NA | 1   | 72.3 (70.3–74.2) | 77.8 (76.0–79.4) | 74.9 (73.0–76.7) | 75.3 (73.6–77.0) | 0.501 (0.476–0.526) | 46.2 (44.7–47.7)                 |
|                                   | AND | NA | 2   | 66.8 (64.7–68.7) | 80.9 (79.3–82.5) | 76.2 (74.3–78.1) | 72.6 (70.9–74.3) | 0.479 (0.454–0.504) | 41.9 (40.5–43.4)                 |
|                                   | OR  | NA | 3   | 85.6 (84.0–87.0) | 69.3 (67.4–71.1) | 71.9 (70.1–73.6) | 84.0 (82.3–86.5) | 0.544 (0.520–0.568) | 57.0 (55.5–58.4)                 |
| IH<br>5<br>ICDs                   | -   | NA | 4   | 50.9 (48.8–53.0) | 85.7 (84.2–87.1) | 76.5 (74.3–78.7) | 65.5 (63.8–67.2) | 0.371 (0.345–0.397) | 31.8 (30.5–33.2)                 |
|                                   | AND | NA | 5   | 47.6 (45.5–49.7) | 87.9 (86.5–89.2) | 78.3 (76.0–80.5) | 64.6 (62.9–66.3) | 0.361 (0.335–0.386) | 29.1 (27.8–30.5)                 |
|                                   | OR  | NA | 6   | 83.4 (81.7–84.9) | 70.2 (68.3–72.0) | 72.0 (70.2–73.7) | 82.1 (80.4–83.8) | 0.532 (0.508–0.557) | 55.4 (54.0–56.9)                 |
| 1 IC<br>or<br>2<br>OC             | -   | 1  | 7   | 15.8 (14.3–17.4) | 91.4 (90.2–92.5) | 62.8 (58.6–66.8) | 54.2 (52.6–55.7) | 0.074 (0.055–0.094) | 9.7 (8.8–10.6)                   |
|                                   | AND | 1  | 8   | 12.5 (11.2–14.0) | 92.9 (91.8–93.9) | 62.0 (57.2–66.5) | 53.6 (52.1–55.2) | 0.056 (0.039–0.074) | 19.7 (18.6–20.9)                 |
|                                   | OR  | 1  | 9   | 25.5 (23.6–27.3) | 85.5 (84.1–86.9) | 61.8 (58.5–65.0) | 55.6 (53.9–57.2) | 0.113 (0.089–0.137) | 14.2 (13.2–15.2)                 |
|                                   | -   | 2  | 10  | 18.6 (17.0–20.3) | 89.9 (88.7–91.1) | 63.0 (59.1–66.7) | 54.6 (53.1–56.2) | 0.088 (0.067–0.109) | 14.2 (13.2–15.2)                 |
|                                   | AND | 2  | 11  | 15.4 (13.9–17.0) | 91.4 (90.2–92.5) | 62.3 (58.0–66.4) | 54.1 (52.5–55.6) | 0.071 (0.051–0.090) | 11.9 (10.9–12.8)                 |
|                                   | OR  | 2  | 12  | 28.5 (26.7–30.5) | 84.2 (82.7–85.7) | 62.4 (59.3–65.5) | 56.2 (54.6–57.9) | 0.131 (0.106–0.155) | 21.9 (20.7–23.1)                 |
| IH<br>or<br>1 IC<br>or<br>2<br>OC | -   | 1  | 13  | 59.1 (57.0–61.2) | 79.8 (78.1–81.4) | 72.8 (70.7–74.9) | 68.0 (66.2–69.7) | 0.392 (0.365–0.418) | 38.8 (37.4–40.3)                 |
|                                   | AND | 1  | 14  | 56.1 (54.0–58.2) | 82.4 (80.8–83.9) | 74.5 (72.4–76.6) | 67.1 (65.4–68.9) | 0.389 (0.363–0.415) | 36.0 (34.6–37.4)                 |
|                                   | OR  | 1  | 15  | 86.9 (85.4–88.3) | 65.1 (63.1–67.0) | 69.6 (67.8–71.3) | 84.4 (82.6–86.0) | 0.514 (0.490–0.539) | 59.8 (58.3–61.2)                 |
|                                   | -   | 2  | 16  | 60.5 (58.4–62.5) | 78.5 (76.8–80.2) | 72.1 (70.0–74.2) | 68.4 (66.6–70.1) | 0.392 (0.366–0.419) | 40.1 (38.7–41.6)                 |
|                                   | AND | 2  | 17  | 57.4 (55.3–59.5) | 81.1 (79.5–82.7) | 73.7 (71.5–75.7) | 67.5 (65.7–69.2) | 0.389 (0.363–0.415) | 37.3 (35.9–38.7)                 |
|                                   | OR  | 2  | 18  | 87.6 (86.1–88.9) | 64.2 (62.2–66.1) | 69.2 (67.4–70.9) | 84.9 (83.2–86.5) | 0.512 (0.488–0.536) | 60.6 (59.2–62.0)                 |

**Abbreviations:** Alg, algorithm; CI, confidence interval; Dx, diagnosis; IC, inpatient claim; ICD, International Classification of Diseases; IH, index hospitalization; NA, not applicable; NPV, negative prediction value; OC, outpatient claim; PPV, positive predictive value; Rx, prescription; Sen, sensitivity; Spe, specificity; Y, years of lookback period.

**Supplementary Table 5. Performance of various algorithms to identify atrial fibrillation**

| Dx                                | Rx  | Y  | Alg | Sen, % (95%CI)   | Spe, % (95%CI)   | PPV, % (95% CI)  | NPV, % (95% CI)  | Kappa (95% CI)      | Estimated Prevalence, % (95% CI) |
|-----------------------------------|-----|----|-----|------------------|------------------|------------------|------------------|---------------------|----------------------------------|
| IH<br>20<br>ICDs                  | -   | NA | 1   | 86.4 (83.2–89.1) | 98.4 (97.9–98.7) | 88.0 (84.9–90.6) | 98.1 (97.7–98.5) | 0.854 (0.831–0.878) | 11.9 (11.0–12.9)                 |
|                                   | AND | NA | 2   | 55.0 (50.7–59.2) | 99.3 (99.0–99.5) | 91.3 (87.7–94.1) | 94.1 (93.3–94.8) | 0.655 (0.618–0.692) | 7.3 (6.6–8.1)                    |
|                                   | OR  | NA | 3   | 89.5 (86.6–91.9) | 96.3 (95.7–96.9) | 76.9 (73.5–80.1) | 98.5 (98.1–98.9) | 0.801 (0.775–0.827) | 14.1 (13.1–15.2)                 |
| IH<br>5<br>ICDs                   | -   | NA | 4   | 65.0 (60.8–69.0) | 98.8 (98.4–99.1) | 88.4 (84.9–91.3) | 95.3 (94.6–96.0) | 0.720 (0.687–0.754) | 8.9 (8.1–9.8)                    |
|                                   | AND | NA | 5   | 41.6 (37.4–45.8) | 99.4 (99.2–99.7) | 91.2 (87.0–94.4) | 92.5 (91.7–93.3) | 0.536 (0.494–0.578) | 5.5 (4.9–6.2)                    |
|                                   | OR  | NA | 6   | 81.5 (78.0–84.6) | 96.6 (96.0–97.1) | 76.6 (73.0–80.0) | 97.4 (96.9–97.9) | 0.760 (0.731–0.789) | 12.9 (12.0–13.9)                 |
| 1 IC<br>or<br>2<br>OC             | -   | 1  | 7   | 27.9 (24.2–31.9) | 99.2 (98.9–99.5) | 82.8 (76.6–87.9) | 90.9 (90.0–91.7) | 0.380 (0.335–0.425) | 4.1 (3.5–4.7)                    |
|                                   | AND | 1  | 8   | 22.9 (19.4–26.6) | 99.5 (99.2–99.7) | 86.3 (79.6–91.4) | 90.3 (89.4–91.2) | 0.327 (0.283–0.372) | 3.2 (2.7–3.8)                    |
|                                   | OR  | 1  | 9   | 36.3 (32.3–40.5) | 97.6 (97.1–98.0) | 67.6 (61.9–72.9) | 91.7 (90.9–92.5) | 0.423 (0.380–0.467) | 6.5 (5.8–7.3)                    |
|                                   | -   | 2  | 10  | 31.6 (27.7–35.6) | 99.0 (98.7–99.3) | 82.1 (76.2–87.0) | 91.3 (90.4–92.1) | 0.417 (0.372–0.461) | 4.7 (4.1–5.3)                    |
|                                   | AND | 2  | 11  | 25.4 (21.8–29.3) | 99.4 (99.1–99.6) | 85.4 (79.0–90.4) | 90.6 (89.7–91.5) | 0.356 (0.311–0.400) | 3.6 (3.1–4.2)                    |
|                                   | OR  | 2  | 12  | 39.9 (35.8–44.2) | 96.9 (96.4–97.5) | 64.3 (59.0–69.4) | 92.1 (91.3–92.9) | 0.441 (0.398–0.483) | 7.5 (6.8–8.3)                    |
| IH<br>or<br>1 IC<br>or<br>2<br>OC | -   | 1  | 13  | 72.6 (68.7–76.3) | 98.4 (97.9–98.7) | 86.0 (82.5–89.0) | 96.3 (95.7–96.9) | 0.761 (0.730–0.791) | 10.2 (9.4–11.2)                  |
|                                   | AND | 1  | 14  | 53.0 (48.7–57.2) | 99.1 (98.8–99.4) | 89.6 (85.7–92.7) | 93.9 (93.1–94.6) | 0.633 (0.595–0.671) | 7.2 (6.4–8.0)                    |
|                                   | OR  | 1  | 15  | 85.1 (81.9–88.0) | 95.3 (94.6–95.9) | 71.5 (67.9–74.9) | 97.9 (97.4–98.3) | 0.743 (0.714–0.772) | 14.5 (13.4–15.5)                 |
|                                   | -   | 2  | 16  | 73.5 (69.6–77.1) | 98.3 (97.8–98.7) | 85.6 (82.1–88.7) | 96.4 (95.8–97.0) | 0.765 (0.734–0.795) | 10.4 (9.5–11.3)                  |
|                                   | AND | 2  | 17  | 54.6 (50.4–58.8) | 99.1 (98.7–99.3) | 89.1 (85.2–92.2) | 94.0 (93.3–94.7) | 0.644 (0.607–0.682) | 7.4 (6.7–8.3)                    |
|                                   | OR  | 2  | 18  | 85.8 (82.7–88.6) | 94.8 (94.1–95.5) | 69.6 (65.9–73.0) | 98.0 (97.5–98.4) | 0.733 (0.703–0.762) | 15.0 (14.0–16.1)                 |

**Abbreviations:** Alg, algorithm; CI, confidence interval; Dx, diagnosis; IC, inpatient claim; ICD, International Classification of Diseases; IH, index hospitalization; NA, not applicable; NPV, negative prediction value; OC, outpatient claim; PPV, positive predictive value; Rx, prescription; Sen, sensitivity; Spe, specificity; Y, years of lookback period.

**Supplementary Table 6. Performance of various algorithms to identify ischemic heart disease**

| Dx                                | Rx  | Y  | Alg | Sen, % (95%CI)   | Spe, % (95%CI)   | PPV, % (95% CI)  | NPV, % (95% CI)  | Kappa (95% CI)      | Estimated Prevalence, % (95% CI) |
|-----------------------------------|-----|----|-----|------------------|------------------|------------------|------------------|---------------------|----------------------------------|
| IH<br>20<br>ICDs                  | -   | NA | 1   | 48.1 (42.5–53.8) | 96.7 (96.1–97.2) | 52.2 (46.3–58.0) | 96.1 (95.5–96.7) | 0.465 (0.414–0.515) | 6.5 (5.8–7.3)                    |
|                                   | AND | NA | 2   | 42.5 (37.0–48.1) | 97.0 (96.4–97.5) | 51.7 (45.5–57.9) | 95.7 (95.0–96.3) | 0.430 (0.378–0.483) | 5.8 (5.1–6.5)                    |
|                                   | OR  | NA | 3   | 94.1 (90.9–96.4) | 13.3 (12.2–14.3) | 7.6 (6.8–8.5)    | 96.7 (94.9–98.0) | 0.012 (0.007–0.016) | 87.3 (86.3–88.2)                 |
| IH<br>5<br>ICDs                   | -   | NA | 4   | 26.6 (21.8–31.8) | 98.1 (97.7–98.5) | 51.8 (43.9–59.7) | 94.6 (93.9–95.3) | 0.319 (0.263–0.374) | 3.6 (3.1–4.2)                    |
|                                   | AND | NA | 5   | 22.8 (18.3–27.8) | 98.3 (97.9–98.7) | 51.0 (42.6–59.5) | 94.4 (93.7–95.0) | 0.284 (0.229–0.340) | 3.2 (2.7–3.7)                    |
|                                   | OR  | NA | 6   | 92.2 (88.7–94.9) | 13.4 (12.4–14.4) | 7.5 (6.7–8.3)    | 95.8 (93.8–97.2) | 0.009 (0.004–0.014) | 87.0 (86.0–88.0)                 |
| 1 IC<br>or<br>2<br>OC             | -   | 1  | 7   | 53.4 (47.8–59.0) | 96.1 (95.5–96.7) | 50.9 (45.4–56.4) | 96.5 (95.8–97.0) | 0.484 (0.435–0.533) | 7.4 (6.7–8.2)                    |
|                                   | AND | 1  | 8   | 51.9 (46.2–57.5) | 96.3 (95.7–96.9) | 51.7 (46.1–57.3) | 96.3 (95.7–96.9) | 0.481 (0.432–0.531) | 7.1 (6.3–7.9)                    |
|                                   | OR  | 1  | 9   | 75.6 (70.5–80.2) | 55.0 (53.4–56.5) | 11.3 (10.0–12.7) | 96.7 (96.0–97.4) | 0.084 (0.068–0.100) | 47.2 (45.7–48.7)                 |
|                                   | -   | 2  | 10  | 58.8 (53.1–64.2) | 95.0 (94.3–95.7) | 47.2 (42.2–52.3) | 96.8 (96.2–97.3) | 0.483 (0.436–0.530) | 8.8 (8.0–9.6)                    |
|                                   | AND | 2  | 11  | 56.6 (50.9–62.1) | 95.2 (94.5–95.9) | 47.4 (42.3–52.5) | 96.7 (96.1–97.2) | 0.475 (0.428–0.523) | 8.4 (7.6–9.3)                    |
|                                   | OR  | 2  | 12  | 79.1 (74.2–83.4) | 50.8 (49.3–52.3) | 10.9 (9.6–12.2)  | 97.0 (96.2–97.6) | 0.077 (0.062–0.091) | 51.3 (49.9–52.8)                 |
| IH<br>or<br>1 IC<br>or<br>2<br>OC | -   | 1  | 13  | 64.4 (58.9–69.6) | 94.9 (94.2–95.6) | 49.0 (44.2–53.9) | 97.2 (96.7–97.7) | 0.518 (0.473–0.564) | 9.3 (8.4–10.1)                   |
|                                   | AND | 1  | 14  | 62.8 (57.3–68.1) | 95.0 (94.3–95.6) | 48.8 (43.9–53.7) | 97.1 (96.6–97.6) | 0.510 (0.464–0.556) | 9.1 (8.3–10.0)                   |
|                                   | OR  | 1  | 15  | 97.2 (94.7–98.7) | 9.5 (8.7–10.5)   | 7.5 (6.8–8.4)    | 97.8 (95.9–99.0) | 0.010 (0.007–0.014) | 90.9 (90.1–91.8)                 |
|                                   | -   | 2  | 16  | 68.1 (62.7–73.2) | 94.0 (93.2–94.7) | 46.2 (41.6–50.8) | 97.5 (97.0–98.0) | 0.509 (0.465–0.553) | 10.4 (9.5–11.3)                  |
|                                   | AND | 2  | 17  | 66.6 (61.1–71.7) | 94.0 (93.3–94.7) | 45.9 (41.3–50.6) | 97.4 (96.8–97.8) | 0.502 (0.457–0.546) | 10.2 (9.4–11.1)                  |
|                                   | OR  | 2  | 18  | 97.5 (95.1–98.9) | 8.9 (8.1–9.8)    | 7.5 (6.7–8.4)    | 97.9 (95.9–99.1) | 0.010 (0.007–0.013) | 91.6 (90.7–92.4)                 |

**Abbreviations:** Alg, algorithm; CI, confidence interval; Dx, diagnosis; IC, inpatient claim; ICD, International Classification of Diseases; IH, index hospitalization; NA, not applicable; NPV, negative prediction value; OC, outpatient claim; PPV, positive predictive value; Rx, prescription; Sen, sensitivity; Spe, specificity; Y, years of lookback period.
